# Supplementary material
Source: PubMed Central journal article supplement (PMC1421508)
Supplement: nar_34_6_e49__1.pdf [file nar_34_6_e49__1.pdf]

| SNP | Gene    | EnsemblID        | dbSNP ID   | SNP500Cancer ID | Polymorphism | Chromosome |
|-----|---------|------------------|------------|-----------------|--------------|------------|
| 1   | IL10    | ENSG00000136634  | rs3021094  | IL10-13         | A/C          | 1          |
| 2   | FSHR    | ENSG00000170820  | rs6166     | FSHR-04         | A/G          | 2          |
| 3   | IL1A    | ENSG00000115008  | rs1800587  | IL1A-02         | C/T          | 2          |
| 4   | MLH1    | ENSG00000076242  | rs2286940  | MLH1-05         | C/T          | 3          |
| 5   | IL15    | ENSG00000164136  | rs2254514  | IL15-01         | C/T          | 4          |
| 6   | CDC25C  | ENSG00000158402  | rs1042124  | CDC25C-01       | G/T          | 5          |
| 7   | IL13    | ENSG00000169194  | rs1295686  | IL13-06         | C/T          | 5          |
| 8   | DEK     | ENSG00000124795  | rs172520   | -               | C/T          | 6          |
| 9   | IGF2R   | ENSG00000164703  | rs998074   | IGF2R-11        | C/T          | 6          |
| 10  | ROS1    | ENSG00000047936  | rs1998206  | ROS1-15         | A/C          | 6          |
| 11  | SLC26A3 | ENSG00000091138  | rs2301635  | -               | C/T          | 7          |
| 12  | MYC     | ENSG00000136997  | rs3824120  | MYC-01          | G/T          | 8          |
| 13  | MXI1    | ENSG00000119950  | rs17658    | -               | G/A          | 10         |
| 14  | TLX1    | ENSG00000107807  | rs1111350  | -               | G/A          | 10         |
| 15  | ERCC6   | ENSG00000032514  | rs2228527  | ERCC6-12        | A/G          | 10         |
| 16  | TLX1    | ENSG00000107807  | rs2235128  | -               | G/A          | 10         |
| 17  | RAG1    | ENSG00000166349  | rs2227973  | RAG1-01         | A/G          | 11         |
| 18  | BRCA2   | ENSG00000139618  | rs144848   | BRCA2-01        | A/C          | 13         |
| 19  | RB1     | ENSG00000139687  | rs4151539  | -               | C/G          | 13         |
| 20  | APEX1   | ENSG00000100823  | rs3136820  | APEX1-03        | G/T          | 14         |
| 21  | PAK6    | ENSG00000137843  | rs11636097 | PAK6-24         | A/G          | 15         |
| 22  | MCL1R   | ENSG00000141037  | rs3212363  | -               | A/T          | 16         |
| 23  | ELAC2   | ENSG00000006744  | rs2523     | -               | T/C          | 17         |
| 24  | ELAC2   | ENSG00000006744  | rs6949     | -               | A/T          | 17         |
| 25  | BRCA1   | ENSG0000012048   | rs16942    | BRCA1-04        | A/G          | 17         |
| 26  | BRCA1   | ENSG000000012048 | rs799917   | BRCA1-02        | C/T          | 17         |
| 27  | TP53    | ENSG00000141510  | rs1042522  | TP53-01         | C/G          | 17         |
| 28  | CSF3    | ENSG00000108342  | rs1042658  | CSF3-02         | C/T          | 17         |
| 29  | BRCA1   | ENSG0000012048   | rs1799950  | BRCA1-18        | A/G          | 17         |
| 30  | DCC     | ENSG00000187323  | rs2229080  | -               | C/G          | 18         |
| 31  | BCL2    | ENSG00000171791  | rs4987843  | -               | A/G          | 18         |
| 32  | SH3GL1  | ENSG00000141985  | rs107288   | -               | C/T          | 19         |
| 33  | IL10    | ENSG00000136634  | rs3024496  | IL10-06         | C/T          | 1          |
| 34  | TP73    | ENSG00000078900  | rs3765713  | -               | G/A          | 1          |
| 35  | MSH6    | ENSG00000116062  | rs1042821  | MSH6-02         | A/G          | 2          |
| 36  | BARD1   | ENSG00000138376  | rs2229571  | BARD1-11        | C/G          | 2          |
| 37  | MSH6    | ENSG00000116062  | rs3136228  | MSH6-01         | G/T          | 2          |
| 38  | TGFBR2  | ENSG00000163513  | rs11466512 | -               | T/A          | 3          |
| 39  | MCC     | ENSG00000171444  | rs3185733  | -               | G/T          | 5          |
| 40  | PTPN12  | ENSG00000127947  | rs2302473  | -               | T/C          | 7          |
| 41  | GNRH1   | ENSG00000147437  | rs6185     | GNRH1-01        | C/G          | 8          |
| 42  | RET     | ENSG00000165731  | rs1800860  | RET-02          | A/G          | 10         |
| 43  | ZNF145  | ENSG00000109906  | rs670984   | -               | C/T          | 11         |
| 44  | XRCC3   | ENSG00000126215  | rs861539   | XRCC3-01        | C/T          | 14         |
| 45  | TCL1A   | ENSG00000100721  | rs1122138  | -               | C/A          | 14         |
| 46  | XRCC1   | ENSG00000073050  | rs25487    | XRCC1-01        | A/G          | 19         |
| 47  | INSR    | ENSG00000171105  | rs1051690  | INSR-06         | A/G          | 19         |
| 48  | BAX     | ENSG00000087088  | rs3817074  | BAX-13          | A/G          | 19         |
| 49  | ASIP    | ENSG00000101440  | rs819136   | ASIP-01         | A/G          | 20         |
| 50  | COMT    | ENSG00000093010  | rs4680     | COMT-01         | A/G          | 22         |
| 51  | TP73    | ENSG00000078900  | rs875233   | -               | T/C          | 1          |
| 52  | TP73    | ENSG00000078900  | rs3765702  | -               | C/T          | 1          |
| 53  | SCLY    | ENSG00000132330  | rs3210400  | -               | G/A          | 2          |
| 54  | IL13    | ENSG00000169194  | rs20541    | IL13-01         | A/G          | 5          |
| 55  | OPRM1   | ENSG00000112038  | rs1799971  | OPRM1-01        | A/G          | 6          |
| 56  | IGF2R   | ENSG00000164703  | rs2282140  | IGF2R-07        | C/T          | 6          |
| 57  | TUSC3   | ENSG00000104723  | rs1035972  | -               | A/G          | 8          |
| 58  | NUP214  | ENSG00000126883  | rs103612   | -               | T/C          | 9          |
| 59  | PTCH    | ENSG00000189024  | rs2236405  | -               | A/T          | 9          |
| 60  | NOTCH1  | ENSG00000148400  | rs11574885 | -               | A/G          | 9          |
| 61  | COPEB   | ENSG00000067082  | rs17731    | -               | A/G          | 10         |
| 62  | RET     | ENSG00000165731  | rs1799939  | RET-03          | A/G          | 10         |
| 63  | SUFU    | ENSG00000107882  | rs1884929  | -               | C/T          | 10         |
| 64  | ERCC6   | ENSG00000032514  | rs4253211  | ERCC6-03        | C/G          | 10         |
| 65  | NUMA1   | ENSG00000137497  | rs1057992  | -               | C/A          | 11         |
| 66  | LIG3    | ENSG00000005156  | rs1052536  | LIG3-08         | C/T          | 17         |
| 67  | LIG1    | ENSG00000105486  | rs20579    | LIG1-03         | C/T          | 19         |
| 68  | BAX     | ENSG00000087088  | rs1805419  | BAX-02          | A/G          | 19         |
| 69  | PARP1   | ENSG00000143799  | rs8679     | PARP1-16        | C/T          | 1          |
| 70  | ARNT    | ENSG00000143437  | rs10847    | ARNT-04         | A/G          | 1          |
| 71  | NRAS    | ENSG00000168638  | rs14804    | -               | C/T          | 1          |
| 72  | NRAS    | ENSG00000168638  | rs2273267  | -               | T/A          | 1          |
| 73  | NPM1    | ENSG00000181163  | rs3830035  | -               | G/A          | 5          |
| 74  | SMO     | ENSG00000128602  | rs2735842  | -               | G/A          | 7          |
| 75  | CDKN2A  | ENSG00000147889  | rs11515    | CDKN2A-02       | C/G          | 9          |

Supplementary Table 1- Data for the 75 SNPs.





| Tag ID | Tag Sequence on chip [5'-->3'] | Tag ID | Tag Sequence on chip [5'-->3'] |
|--------|--------------------------------|--------|--------------------------------|
| LT2    | CGCAGGTATCGTATTAAATGATCTGC     | LT79   | CGTTCAGATAGAGCCACTGATGAGG      |
| LT3    | CCTCATGTCAACGAGAACAGAAC        | LT80   | CATTGTGCATCATATGACGGAACCAT     |
| LT4    | ATTGAAGCCTGCCGTCCGAGACATA      | LT81   | TCCAGCATAAGCGGCTACATGATACC     |
| LT5    | AGACTGCGTGTGGCTCTGTACAG        | LT82   | CTCTGCATCGTTCATTATATATGC       |
| LT6    | TTATGGTGATCAGTCAACCACCAGG      | LT83   | GCAATTCAGATCTCTCACCTACCAA      |
| LT7    | GAGACACCTTATGTTCTATACATGC      | LT84   | ATTATCTCTGGCGGTGTGACATAA       |
| LT8    | TCCATGCGCTTGCTTTCATCTAGC       | LT85   | ATACTGAGCACATCAGCAGGACCCAC     |
| LT9    | GCCTTACATACATCTGTCGGTTGTA      | LT86   | CAGGAGAATCCAGATGGATGCACAA      |
| LT10   | CACAAGGAGGTGACACCAGATTGAA      | LT87   | TCCGAGAATAACGAGTGGATCCATT      |
| LT11   | GCCACAGATAAATATTCACATCGTGT     | LT88   | AGAACCACCAGCCTGATGTGGTTAA      |
| LT12   | ACACATACGATCTGCGAACTTCAA       | LT89   | CGCAACATGCTCTGCTTATAGCAATT     |
| LT13   | TTACAGGATGTGCTCAACAGACGTT      | LT90   | TATGACTATCAAGGCCGCTGAGTG       |
| LT14   | GCTCACAATAATTGCATGAGTTGCC      | LT91   | ACCAATAACGCTTCACTCGAGGCGGT     |
| LT15   | CTGCACTGCTCATTAAATATACTTCTGG   | LT92   | GAGCACCCATGCAATATGCCATTG       |
| LT16   | TTACGCACCTGACTGACAGACTGCTT     | LT93   | ATTGAGGATCGTCTTGGGCTCAGAGC     |
| LT17   | CAACATCATCAGCAGAGCATCATT       | LT94   | AGAGGCAGAACTGGCAGACGACATG      |
| LT18   | GCATCAGTAACTCCTTCGTGTATT       | LT95   | CCAGGTTGATATTGATTCAGAGGTA      |
| LT19   | GGCGTTATCACGGTAATGATTAACAGC    | LT96   | CGACATCACTCCGGTTAACGATGAA      |
| LT20   | ACATCAATCTCTGACCGTTCCGC        | LT97   | TGACGACTTATTGCCGCTCTGTTCC      |
| LT21   | GCCTTATGCTCGAACTGACCATAAC      | LT98   | ACCGGACATATCCTCGAGCGTACC       |
| LT22   | CGGATATCACCCAGCATCAATATAGGTAA  | LT99   | GGATCGATGTGAGAGCTGTCGAACAG     |
| LT23   | CCTTAATCTGCTGCAATGCCACAGC      | LT100  | TGAAGCGTGAAGGCTGCATATGTT       |
| LT24   | TAGCTCTCCGCTCAATGACGTCA        | LT101  | TAGCGTACTGAAGAAGCACCAGGAA      |
| LT25   | AGGAACGCCTTACGTTGATTATTGA      | LT102  | AGGAGGATCTGGAATTCATGATGAA      |
| LT26   | GAGTCAGTACCGATGTAGCCGATAA      | LT103  | AACAGAGAGGTTGCAAGTGGAGGAA      |
| LT27   | ACTCGAATGAACCAGGCGATAATGG      | LT104  | TTCTGGGCGAGTTAATCGAACAAGAC     |
| LT28   | ATTATATCTGCCGCGAAGGTACGCC      | LT105  | ACATCATTACGCATCGTATACGCG       |
| LT29   | GGACAGACAGTGGCTACGGCTCAGTT     | LT106  | GTATCTGCATATGATGTCTGACGCTGGC   |
| LT30   | CGGTATTCGCTTAATTCAGCACAAAC     | LT107  | AGTGTGATGATGACCGTACTCAA        |
| LT31   | GCTCTTACCTGTTGTCAGATATAA       | LT108  | GGTATAGATATAGAGTCGGCATAACA     |
| LT32   | GAATCGGTAGTAAGCCCGCCTCTT       | LT109  | CTGCTACGACCACTGGATGATATGG      |
| LT33   | CAATCATGCTGCTAACGTGTGACCG      | LT110  | GCAGACGTAACCAATATTCGAATTG      |
| LT34   | ATGTTGTCTGCGATTGACTCTTCTT      | LT111  | GCTATACAGGCCAACATTGAGTTAT      |
| LT35   | ATTAGCATCGTCACAGCGGATATG       | LT112  | GACAGCGAGAAATCAACAGTGATAAT     |
| LT36   | ATGTTGCGAGCACTTGCAGTACCTT      | LT113  | ACATTCATGGCTTGCATCGCTACGAA     |
| LT37   | AGTTCGTGCTTACCGCAGAAATGCAG     | LT114  | AATGCTCAATGGATACATAGACAGGG     |
| LT38   | CCTGTACCTGAATCAATGTTAGGTT      | LT115  | TGCTCTCGGAATATCAATGAAGGAA      |
| LT39   | CCAGATTACCTGCTGATGATCAACTG     | LT116  | GGCTATCTATCGGCTTATTAGTACTTG    |
| LT40   | ATAATCGGCGTGGCAGATAAACATAT     | LT117  | TCATGGACAGTTCGACCGTGTGTTAA     |
| LT41   | TTGTGCAATCCAATCGTATCCAGTT      | LT118  | TATTGGACTCAAGAATGCTGCCAGC      |
| LT42   | AACCATTGAGAACGTCGTTGACGATG     | LT119  | GTCCTACGGTCAAGAGAAAGCAATAA     |
| LT43   | GCTTCAACGAGCATGTCTGGAATGG      | LT120  | GATAGGATTAGAAGTTCGAACCGTT      |
| LT44   | CACCTCTCGATAGTCCAGCGATGGC      | LT121  | AGAATATTAAGCTCGACAGTCACT       |
| LT45   | AGTTCGACGCGATACGGAACGAGAT      | LT122  | ACCTTAGTAGTTGGTAACTGACAA       |
| LT46   | CGCATTCGTTGTAATATTCGCTTC       | LT123  | ATGAGGTACACCAAGCCATTATCC       |
| LT47   | GATACATGGTAAGTCGCGTCTCTT       | LT124  | AGAGTTATGATCAGTGCCTAGCAA       |
| LT48   | TATTCGGATCGCTCATCAGTTCTGC      | LT125  | GCTTATCGGAAAGTGAACGAAATCCT     |
| LT49   | CAGGTGAGCCGTGATGTTGAAGGTT      | LT126  | TTGTAATGTCGCTCCGCGACATAG       |
| LT50   | ATACTTCGTCGCTGTCTCGCCACAC      | LT127  | TACTTCTCCAGGCTTCCGACCAACGA     |
| LT51   | TAGCTCGTACCATGCTCTGATACAGG     | LT128  | TGTGCCGTTCCACTTCTGATATCC       |
| LT52   | TTCTTCTCGGTACATAAATCTCCTT      | LT129  | ATTAGTTCGGCCAGCAGATTATAA       |
| LT53   | GCAGTTACCGAGATGTTCCGGTATT      | LT130  | TACCAACTGTATGCGCATGTGCACC      |
| LT54   | CCATGCGAGGATATCTTCTTCTCAA      | LT131  | CCTGTTGAACCGCTCAGACTGTGAG      |
| LT55   | GATGCCAATCCACGTTGTTAATTCC      | LT132  | CTGAGACAATACAGCACGACCGCTG      |
| LT56   | CTGCAATACGGTGAAGGTTATATCC      | LT133  | GCAAGCGGTTAGTCATGGTGGTAG       |
| LT57   | TTGGATGTTCAACACCTGTATCCATGA    | LT134  | CAGCGTATTCAGTGCCTGAGGTGAC      |
| LT58   | TGTATAAGCTCTAATAGTCCGCAA       | LT135  | TAACATCTGCAATCGCGCCAGTAC       |
| LT59   | CTGGTTGACTGGCCTATTACCACAA      | LT136  | AAGCGGCACAGCTGAAGCTATATCTT     |
| LT60   | ACGAGAGACGTCACCTAAGCAGGCC      | LT137  | TACTCCACATCCATGCTTAACGCC       |
| LT61   | TCCTGAATGGTTACTACGATTGGTT      | LT138  | CTGTATACCTGCACCTCCAGCCACTG     |
| LT62   | GCTCAGTAATGTAGATGGTCATCTT      | LT139  | TAATCCATTGTAAGTCCGCGACACC      |
| LT63   | CAGTCATATGGACAAGCTCATCTGCG     | LT140  | AACGTCCACGCGGCTCTCATAGTG       |
| LT64   | CCATATCAACACGCTCGCTGACGTT      | LT141  | TCATAACGGTACTTCAAGTTAATCC      |
| LT65   | GTTCTGGTACGCGTTAGCCAGGCTC      | LT142  | TGCCGCTGACAGTACGCTTACTTCC      |
| LT66   | AAGTTAACCATCTGTGCGGCGATGTT     | LT143  | CGTACCAAGATAACGCGTGTGGTT       |
| LT67   | TGGTCAGAGGATTCGCCAGAATTCT      | LT144  | TTCAGTGTATGACGACAGGCGGTT       |
| LT69   | CCGAATAAGCCTCAAGCAGCATATT      | LT145  | CGTGACACCGGATATGTTGGTATTCC     |
| LT70   | GTTACCTCTGCCGAAGTTGAGTATT      | LT146  | TAAGCCATCCACCGGACCTCAATC       |
| LT71   | ATGACCTCAGAACTCCATCTGGATT      | LT147  | TGGACTTCAGGTTGCTTCTGCTTC       |
| LT72   | CTTCTCAGTTCGAAGCATTCGAGTT      | LT148  | GAGCACCACTGCGCAGGAGGAA         |
| LT73   | AAGCAACGCACTCTCGATTCTGAGA      | LT149  | TCAGGCAGAGTCTCATGTAAGTCCGC     |
| LT74   | ATAGTCAACACGCGGTTAGAT          | LT151  | TTACGCCACAGTCACTCCTCAGGAT      |
| LT76   | AGTATGCAGCCGCTCACTTAGAAGTG     | LT153  | TTCTGCTCTGACATGACGTTATCCA      |
| LT77   | AATGACAAGAGTCTGGTTCAGAAGA      | LT154  | ACACTCTGGCTGATGGACGCAATCT      |
| LT78   | ACAGCCTCGCAGATGACGAATCATT      | LT155  | CCTAACAGTGGCTGAGTGACTCG        |

**Supplementary Table 4 - Chip tags. Each tag has a 15T-spacer and an amino modifier C6 at the 5'-end.**

| Information |         |            |          |          | Genotype calls   TnT |          |          | Genotype calls   dbSNP |          |          |
|-------------|---------|------------|----------|----------|----------------------|----------|----------|------------------------|----------|----------|
| SNP         | Gene    | dbSNP ID   | Allele 1 | Allele 2 | Allele 1             | Allele 2 | Heteroz. | Allele 1               | Allele 2 | Heteroz. |
| 1           | IL10    | rs3021094  | G        | T        | 6,77%                | 93,23%   | 11,46%   | 10,0%                  | 90,0%    | 18,0%    |
| 2           | FSHR    | rs6166     | G        | A        | 47,92%               | 52,08%   | 45,83%   | 38,0%                  | 62,0%    | 47,0%    |
| 3           | IL1A    | rs1800587  | A        | G        | 30,46%               | 69,54%   | 51,04%   | 30,0%                  | 70,0%    | 40,0%    |
| 4           | MLH1    | rs2286940  | A        | G        | 8,70%                | 91,30%   | 14,58%   | 27,0%                  | 73,0%    | 40,0%    |
| 5           | IL15    | rs2254514  | T        | C        | 22,40%               | 77,60%   | 38,54%   | 17,0%                  | 83,0%    | 28,0%    |
| 6           | CDC25C  | rs1042124  | T        | G        | 80,53%               | 19,47%   | 30,21%   | 91,0%                  | 9,0%     | 15,0%    |
| 7           | IL13    | rs1295686  | C        | T        | 85,42%               | 14,58%   | 25,00%   | 61,0%                  | 39,0%    | 47,0%    |
| 8           | DEK     | rs172520   | T        | C        | 15,26%               | 84,74%   | 23,96%   | 30,0%                  | 70,0%    | 42,0%    |
| 9           | IGF2R   | rs998074   | C        | T        | 42,71%               | 57,29%   | 50,00%   | 55,0%                  | 45,0%    | 50,0%    |
| 10          | ROS1    | rs1998206  | G        | T        | 12,63%               | 87,37%   | 25,00%   | 15,0%                  | 85,0%    | 25,0%    |
| 11          | SLC26A3 | rs2301635  | T        | C        | 0,00%                | 100,00%  | 0,00%    | 1,0%                   | 99,0%    | 2,0%     |
| 12          | MYC     | rs3824120  | G        | T        | 88,02%               | 11,98%   | 21,88%   | 92,0%                  | 8,0%     | 15,0%    |
| 13          | MXI1    | rs17658    | G        | A        | 68,23%               | 31,77%   | 46,88%   | 78,0%                  | 22,0%    | 35,0%    |
| 14          | TLX1    | rs1111350  | G        | A        | 81,25%               | 18,75%   | 27,08%   | 85,0%                  | 15,0%    | 26,0%    |
| 15          | ERCC6   | rs2228527  | G        | A        | 23,44%               | 76,56%   | 36,46%   | 14,0%                  | 86,0%    | 25,0%    |
| 17          | RAG1    | rs2227973  | G        | A        | 7,29%                | 92,71%   | 14,58%   | 23,0%                  | 77,0%    | 26,0%    |
| 18          | BRCA2   | rs144848   | T        | G        | 66,49%               | 33,51%   | 40,63%   | 75,0%                  | 25,0%    | 38,0%    |
| 19          | RB1     | rs4151539  | C        | G        | 100,00%              | 0,00%    | 0,00%    | 99,0%                  | 1,0%     | 2,0%     |
| 20          | APEX1   | rs3136820  | T        | G        | 52,66%               | 47,34%   | 57,29%   | 56,0%                  | 44,0%    | 50,0%    |
| 21          | PAK6    | rs11636097 | G        | A        | 32,11%               | 67,89%   | 48,96%   | 31,0%                  | 68,0%    | 43,0%    |
| 22          | MC1R    | rs3212363  | T        | A        | 22,11%               | 77,89%   | 27,08%   | 46,0%                  | 53,0%    | 50,0%    |
| 23          | ELAC2   | rs2523     | A        | G        | 61,05%               | 38,95%   | 47,92%   | 50,0%                  | 50,0%    | 50,0%    |
| 24          | ELAC2   | rs6949     | T        | A        | 4,69%                | 95,31%   | 9,38%    | 36,0%                  | 74,0%    | 39,0%    |
| 25          | BRCA1   | rs16942    | C        | T        | 46,02%               | 53,98%   | 61,46%   | 29,0%                  | 71,0%    | 41,0%    |
| 26          | BRCA1   | rs799917   | T        | C        | 39,36%               | 60,64%   | 47,92%   | 46,0%                  | 54,0%    | 50,0%    |
| 27          | TP53    | rs1042522  | C        | G        | 72,11%               | 27,89%   | 34,38%   | 55,0%                  | 45,0%    | 50,0%    |
| 28          | CSF3    | rs1042658  | T        | C        | 39,06%               | 60,94%   | 48,96%   | 41,0%                  | 59,0%    | 48,0%    |
| 29          | BRCA1   | rs1799950  | G        | A        | 4,17%                | 95,83%   | 6,25%    | 2,0%                   | 98,0%    | 4,0%     |
| 30          | DCC     | rs2229080  | C        | G        | 35,42%               | 64,58%   | 41,67%   | 44,0%                  | 56,0%    | 49,0%    |
| 31          | BCL2    | rs4987843  | C        | T        | 89,58%               | 10,42%   | 20,83%   | 88,0%                  | 12,0%    | 22,0%    |
| 32          | SH3GL1  | rs107288   | A        | G        | 43,48%               | 56,52%   | 50,00%   | 26,0%                  | 74,0%    | 39,0%    |
| 33          | IL10    | rs3024496  | A        | G        | 48,81%               | 51,19%   | 43,75%   | 68,0%                  | 32,0%    | 44,0%    |
| 35          | MSH6    | rs1042821  | T        | C        | 18,09%               | 81,91%   | 33,33%   | 16,0%                  | 84,0%    | 28,0%    |
| 36          | BARD1   | rs2229571  | C        | G        | 33,85%               | 66,15%   | 51,04%   | 44,0%                  | 56,0%    | 29,0%    |
| 37          | MSH6    | rs3136228  | T        | G        | 62,11%               | 37,89%   | 54,17%   | 88,0%                  | 12,0%    | 22,0%    |
| 38          | TGFBR2  | rs11466512 | T        | A        | 24,48%               | 75,52%   | 36,46%   | 30,0%                  | 70,0%    | 42,0%    |
| 39          | MCC     | rs3185733  | T        | G        | 54,69%               | 45,31%   | 38,54%   | 59,0%                  | 41,0%    | 48,0%    |
| 41          | GNRH1   | rs6185     | C        | G        | 25,52%               | 74,48%   | 34,38%   | 29,0%                  | 71,0%    | 41,0%    |
| 42          | RET     | rs1800860  | C        | T        | 71,35%               | 28,65%   | 36,46%   | 77,0%                  | 23,0%    | 36,0%    |
| 43          | ZNF145  | rs670984   | A        | G        | 39,06%               | 60,94%   | 46,88%   | 35,0%                  | 65,0%    | 21,5%    |
| 44          | XRCC3   | rs861539   | T        | C        | 28,42%               | 71,58%   | 52,08%   | 23,0%                  | 77,0%    | 35,0%    |
| 45          | TCL1A   | rs1122138  | G        | T        | 86,17%               | 13,83%   | 22,92%   | 89,0%                  | 11,0%    | 20,0%    |
| 46          | XRCC1   | rs25487    | G        | A        | 58,85%               | 41,15%   | 44,79%   | 72,0%                  | 28,0%    | 40,0%    |
| 47          | INSR    | rs1051690  | G        | A        | 82,81%               | 17,19%   | 28,13%   | 82,0%                  | 18,0%    | 30,0%    |
| 48          | BAX     | rs3817074  | A        | C        | 17,71%               | 82,29%   | 27,08%   | 14,0%                  | 86,0%    | 24,0%    |
| 49          | ASIP    | rs819136   | G        | A        | 88,20%               | 11,80%   | 21,88%   | 78,0%                  | 22,0%    | 34,0%    |
| 50          | COMT    | rs4680     | G        | A        | 44,27%               | 55,73%   | 57,29%   | 64,0%                  | 36,0%    | 46,0%    |
| 51          | TP73    | rs875233   | T        | C        | 83,33%               | 16,67%   | 25,00%   | 72,0%                  | 28,0%    | 40,0%    |
| 53          | SCLY    | rs3210400  | C        | T        | 56,77%               | 43,23%   | 55,21%   | 78,0%                  | 22,0%    | 35,0%    |
| 54          | IL13    | rs20541    | T        | C        | 14,58%               | 85,42%   | 25,00%   | 22,0%                  | 78,0%    | 34,0%    |
| 55          | OPRM1   | rs1799971  | C        | T        | 12,50%               | 87,50%   | 22,92%   | 19,0%                  | 81,0%    | 30,0%    |
| 56          | IGF2R   | rs2282140  | T        | C        | 11,98%               | 88,02%   | 23,96%   | 15,0%                  | 85,0%    | 26,0%    |
| 57          | TUSC3   | rs1035972  | G        | A        | 27,44%               | 72,56%   | 44,79%   | 34,0%                  | 66,0%    | 45,0%    |
| 58          | NUP214  | rs103612   | T        | C        | 69,41%               | 30,59%   | 37,50%   | 66,0%                  | 34,0%    | 45,0%    |
| 59          | PTCH    | rs2236405  | T        | A        | 98,96%               | 1,04%    | 2,08%    | 96,0%                  | 4,0%     | 7,0%     |
| 61          | COPEB   | rs17731    | C        | T        | 66,67%               | 33,33%   | 45,83%   | 48,0%                  | 52,0%    | 50,0%    |
| 62          | RET     | rs1799939  | G        | T        | 76,56%               | 23,44%   | 36,46%   | 83,0%                  | 17,0%    | 28,0%    |
| 63          | SUFU    | rs1884929  | T        | C        | 41,15%               | 58,85%   | 57,29%   | 35,0%                  | 65,0%    | 45,0%    |
| 64          | ERCC6   | rs4253211  | C        | G        | 90,63%               | 9,38%    | 18,75%   | 93,0%                  | 7,0%     | 13,0%    |
| 65          | NUMA1   | rs1057992  | G        | T        | 97,92%               | 2,08%    | 4,17%    | 89,0%                  | 11,0%    | 20,0%    |
| 66          | LIG3    | rs1052536  | T        | C        | 41,15%               | 58,85%   | 21,88%   | 34,0%                  | 66,0%    | 45,0%    |
| 67          | LIG1    | rs20579    | T        | C        | 12,50%               | 87,50%   | 22,92%   | 16,0%                  | 84,0%    | 27,0%    |
| 68          | BAX     | rs1805419  | G        | A        | 69,57%               | 30,43%   | 35,42%   | 60,0%                  | 40,0%    | 48,0%    |
| 69          | PARP1   | rs8679     | A        | G        | 79,17%               | 20,83%   | 31,25%   | 78,0%                  | 22,0%    | 30,0%    |
| 72          | NRAS    | rs2273267  | T        | A        | 100,00%              | 0,00%    | 0,00%    | 95,0%                  | 5,0%     | 10,0%    |
| 73          | NPM1    | rs3830035  | G        | T        | 56,79%               | 43,21%   | 50,00%   | 55,0%                  | 45,0%    | 50,0%    |
| 74          | SMO     | rs2735842  | G        | A        | 78,65%               | 21,35%   | 32,29%   | 73,0%                  | 27,0%    | 39,0%    |
| 75          | CDKN2A  | rs11515    | C        | G        | 86,98%               | 13,02%   | 23,96%   | 90,0%                  | 10,0%    | 10,0%    |

**Supplementary Table 5 - Genotype calls.**
