# Supplementary material
Source: PubMed Central journal article supplement (PMC1421508)
Supplement: nar_34_6_e49__2.pdf [file nar_34_6_e49__2.pdf]

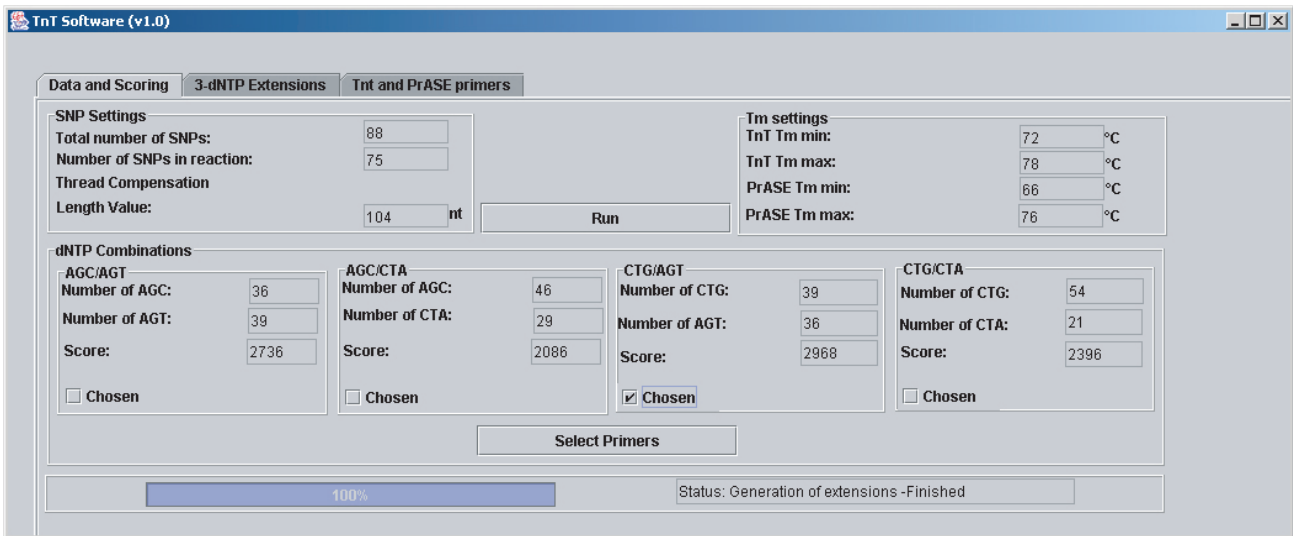

**Supplementary Figure 1a** - The 'Data and Scoring' tab included in the TnT software. Settings, SNP distributions and the total score of the four different 3-dNTP combinations are presented.

| SNP Id     | Type | varia... | 3-dN... | Sc... | Ex... | Ext       | 3-d... | Sc... | Ext... | Ext          | 3-dN... | Sc... | Ext... | Ext         | 3-d... | Sc... | E... | Ext          | Exclude                  |
|------------|------|----------|---------|-------|-------|-----------|--------|-------|--------|--------------|---------|-------|--------|-------------|--------|-------|------|--------------|--------------------------|
| rs8679     | Y    | C/T      | CTA     | 16    | 4     | YACT      | TGC    | 2     | 1      | Y            | GTA     | 8     | 3      | RTT         | AGC    | 2     | 1    | R            | <input type="checkbox"/> |
| rs10847    | R    | A/G      | AGC     | 16    | 4     | RGAC      | GTA    | 8     | 3      | RGA          | TGC     | 8     | 3      | YTG         | CTA    | 4     | 2    | YT           | <input type="checkbox"/> |
| rs14804    | Y    | C/T      | CTA     | 8     | 3     | YAT       | TGC    | 2     | 1      | Y            | GTA     | 8     | 3      | RTG         | AGC    | 2     | 1    | R            | <input type="checkbox"/> |
| rs875233   | Y    | C/T      | CTA     | 8     | 3     | YCC       | TGC    | 16    | 4      | YCCG         | GTA     | 2     | 1      | R           | AGC    | 4     | 2    | RC           | <input type="checkbox"/> |
| rs2273267  | W    | A/T      | CTA     | 2     | 1     | W         | GTA    | 8     | 3      | WGA          | GTA     | 8     | 3      | WTG         | CTA    | 4     | 2    | WT           | <input type="checkbox"/> |
| rs3021094  | M    | A/C      | CTA     | 2     | 1     | M         | AGC    | 32    | 9      | MGGAGGACC    | GTA     | 2     | 1      | K           | TGC    | 64    | 5    | KCCTC        | <input type="checkbox"/> |
| rs3024496  | Y    | C/T      | CTA     | 16    | 4     | YATA      | TGC    | 2     | 1      | Y            | GTA     | 32    | 10     | RAGAGAGGTA  | AGC    | 32    | 8    | RAGAGAGG     | <input type="checkbox"/> |
| rs3765702  | Y    | C/T      | CTA     | 2     | 1     | Y         | TGC    | 16    | 12     | YGGCTCGGTCTC | GTA     | 4     | 2      | RT          | AGC    | 2     | 1    | R            | <input type="checkbox"/> |
| rs3765713  | R    | A/G      | AGC     | 64    | 6     | RCAGAG    | GTA    | 2     | 1      | R            | TGC     | 32    | 9      | YTCGTTCTG   | CTA    | 8     | 3    | YTC          | <input type="checkbox"/> |
| rs6186     | R    | A/G      | AGC     | 2     | 1     | R         | GTA    | 64    | 6      | RTGGTT       | TGC     | 64    | 6      | YTGSTG      | CTA    | 4     | 2    | YT           | <input type="checkbox"/> |
| rs17561    | K    | G/T      | GTA     | 2     | 1     | K         | TGC    | 4     | 2      | KC           | CTA     | 4     | 2      | MT          | AGC    | 2     | 1    | M            | <input type="checkbox"/> |
| rs1042821  | Y    | C/T      | CTA     | 4     | 2     | YC        | TGC    | 32    | 8      | YCGGGGGC     | GTA     | 8     | 3      | RGG         | AGC    | 64    | 5    | RGGCC        | <input type="checkbox"/> |
| rs1800587  | Y    | C/T      | CTA     | 64    | 5     | YCATT     | TGC    | 4     | 2      | YC           | GTA     | 64    | 6      | RTGTTG      | AGC    | 2     | 1    | R            | <input type="checkbox"/> |
| rs2229571  | S    | C/G      | AGC     | 32    | 9     | SAAAAACAG | TGC    | 2     | 1      | S            | TGC     | 32    | 8      | SCTCCCTG    | AGC    | 4     | 2    | SC           | <input type="checkbox"/> |
| rs3136228  | K    | G/T      | GTA     | 2     | 1     | K         | TGC    | 32    | 10     | KCTCCTTGGC   | CTA     | 4     | 2      | MC          | AGC    | 0     | 21   | MCGGAGCGA... | <input type="checkbox"/> |
| rs3210400  | R    | A/G      | AGC     | 64    | 7     | RCAGAGG   | GTA    | 2     | 1      | R            | TGC     | 16    | 11     | YCTGCCCGCTC | CTA    | 8     | 3    | YCT          | <input type="checkbox"/> |
| rs1464645  | Y    | C/T      | CTA     | 2     | 1     | Y         | TGC    | 4     | 2      | YG           | GTA     | 4     | 2      | RT          | AGC    | 2     | 1    | R            | <input type="checkbox"/> |
| rs2286940  | Y    | C/T      | CTA     | 4     | 2     | YA        | TGC    | 2     | 1      | Y            | GTA     | 64    | 6      | RGTAGA      | AGC    | 4     | 2    | RG           | <input type="checkbox"/> |
| rs11466512 | W    | A/T      | CTA     | 8     | 3     | WCA       | GTA    | 2     | 1      | W            | GTA     | 32    | 9      | WTGGGGAAA   | CTA    | 4     | 2    | WT           | <input type="checkbox"/> |
| rs2254514  | Y    | C/T      | CTA     | 2     | 1     | Y         | TGC    | 64    | 5      | YGTGG        | GTA     | 16    | 4      | RATG        | AGC    | 4     | 2    | RA           | <input type="checkbox"/> |

**Supplementary Figure 1b** - The second tab in the software displaying all possible in silico extensions for each SNP. The first three columns represent SNP Id, SNP Type and SNP variation. In the following columns, the score, the number of incorporated bases (Extension length) and the bases incorporated (Extension) in each possible in silico 3-dNTP extension are indicated. Note that self-complementary SNPs (W and S) generate two different dNTP extensions, while all others generate four. Marking of the last column excludes the SNP.

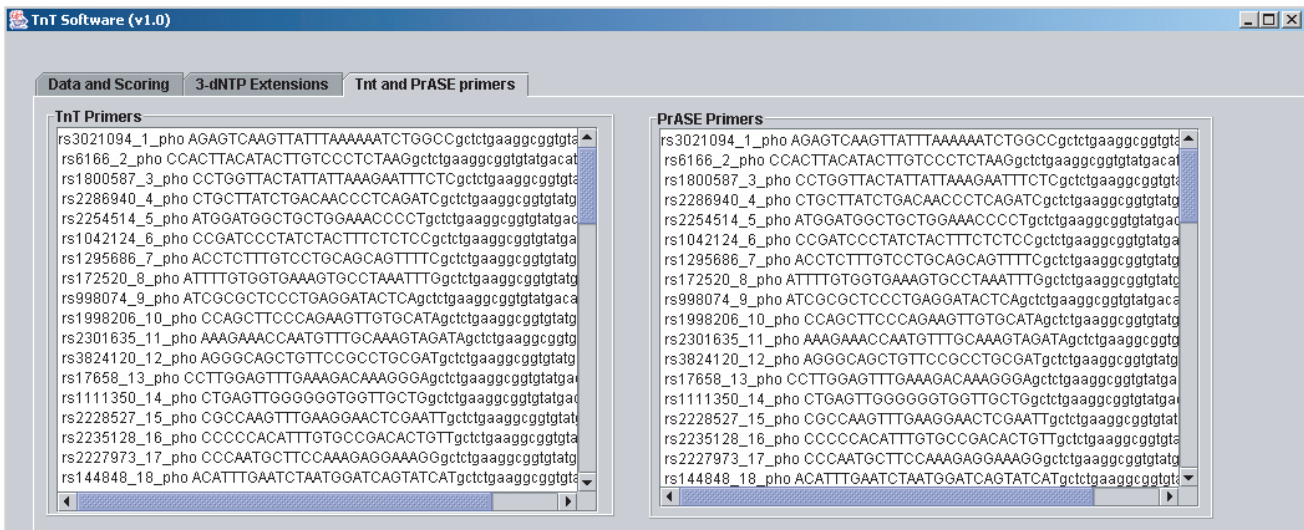

**Supplementary Figure 1c** - Primer selection for the TnT and PrASE reactions. Tags are marked as lowercase and primer sequences as uppercase letters.
